# Supplementary material for: Piezoelectric Biocomposites for Bone Grafting in Dentistry
Source: MDPI journal article supplement (doi:10.3390/polym15112446), 2023-05-25
Supplement: s1 [file s1]

SUPPLEMENTARY DATA:

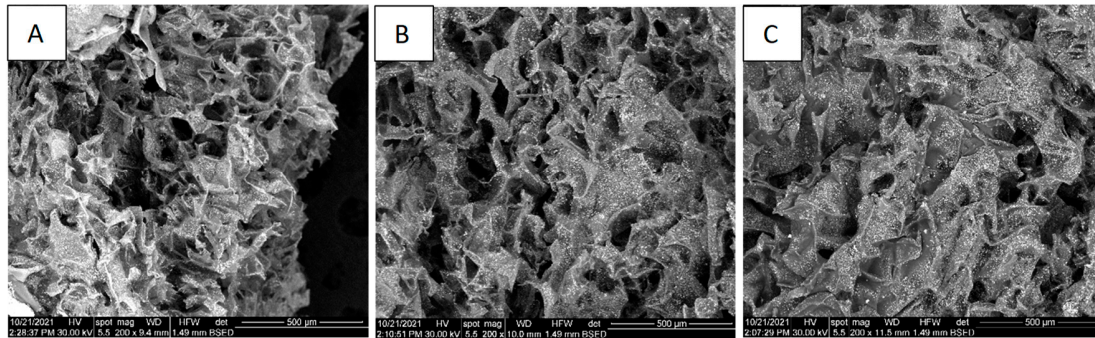

Figure S1. SEM images of lyophilized composite scaffolds: 90HA-10KNN-CSL (A), 50HA-50KNN-CSL (B), 10HA-90KNN-CSL (C)

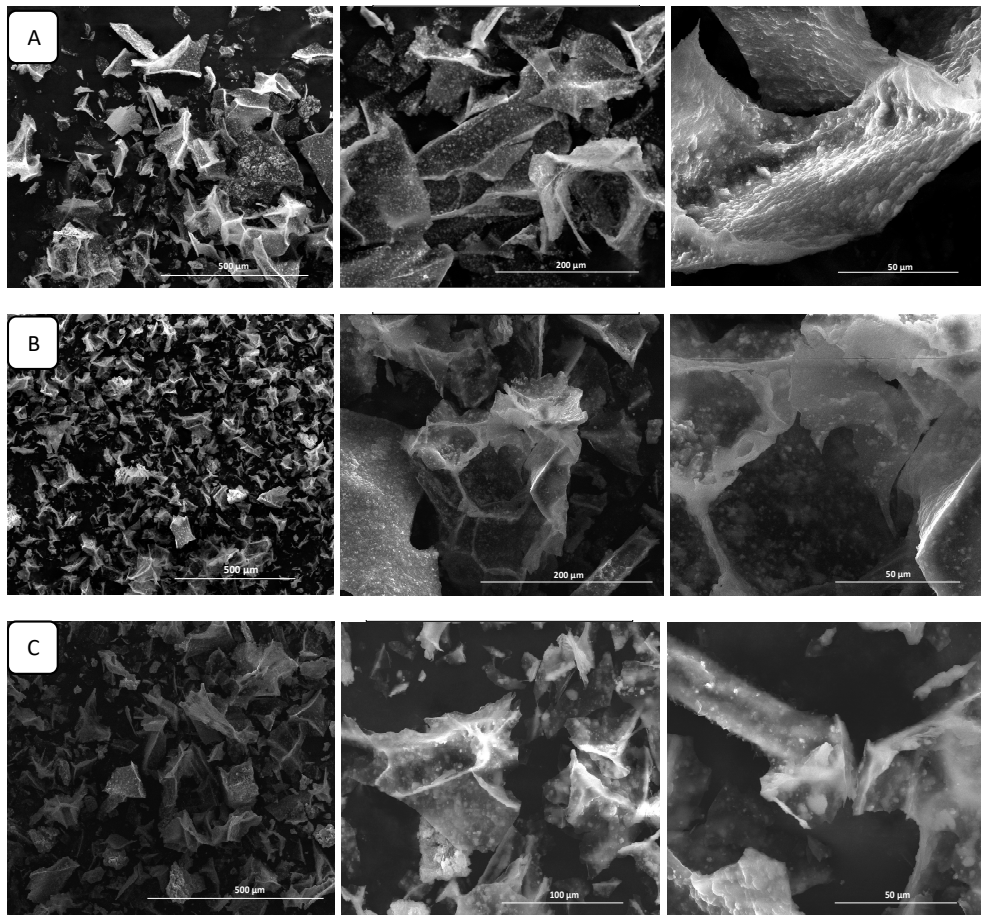

Figure S2. SEM images of composite grains obtained from porous scaffold cryogrinding: 90HA-10KNN-CSL (A), 50HA-50KNN-CSL (B), 10HA-90KNN-CSL (C)

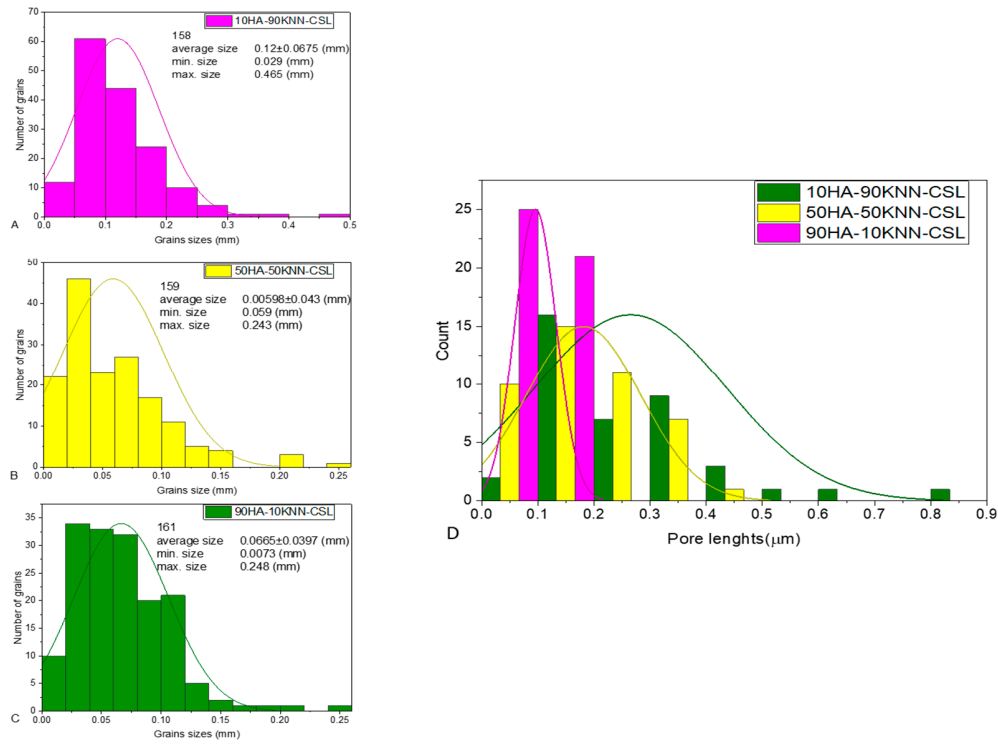

Figure S3. Histograms of the composite grains 10HA-90KNN-CSL(A), 50HA-50KNN-CSL(B) and 90HA-10KNN-CSL(C) and the comparative histograms of the grains pores size distribution(D)

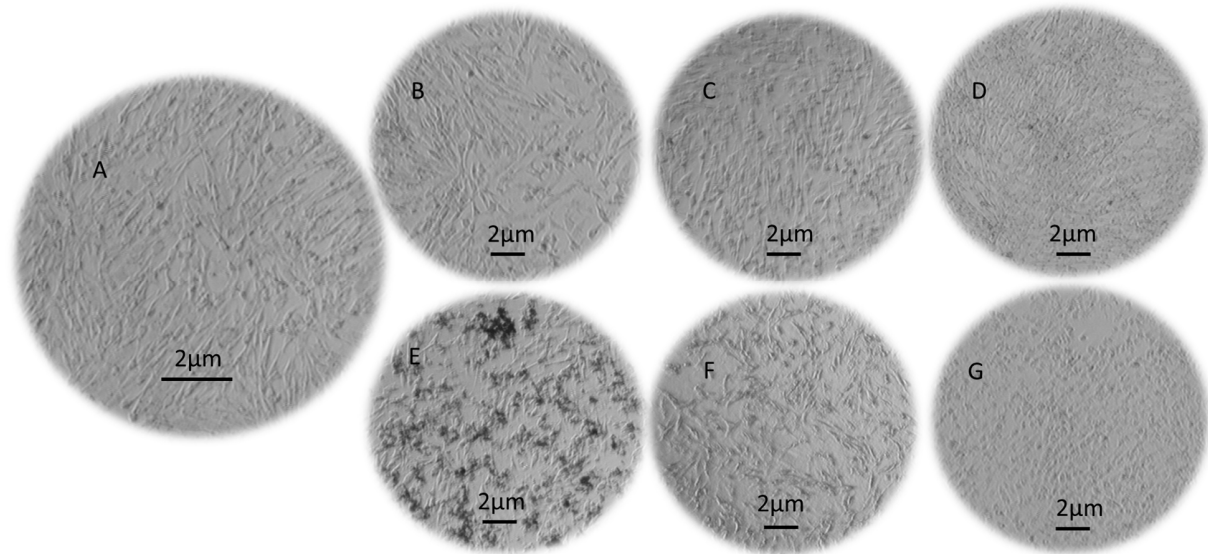

Figure S4. Optical microscopy images (5x) of samples after 7 days of incubation in contact with osteoblast-like MG-63: (A) negative control(CTRL), (B) scaffold 90HA-10KNN-CSL, (C) scaffold 10HA-90KNN-CSL, (D) scaffold CSL, (E) hydrogel 90HA-10KNN-CSLG, (F) hydrogel 10HA-90KNN-CSLG, (G) hydrogel CSLG.
